# Supplementary material for: Incidentally diagnosed cancer and commonly preceding clinical scenarios: a cross-sectional descriptive analysis of English audit data
Source: PubMed Central journal article supplement (PMC6756358; doi:10.1136/bmjopen-2018-028362), 2019-09-17

Supplementary files for Koo et al., 2019

Supplementary information for "*Incidentally diagnosed cancer and commonly preceding clinical scenarios: a cross-sectional descriptive analysis of English audit data*" Koo et al., 2019

### Table of contents

- Supplementary Figure 1: Flow chart describing sample derivation for main analysis
- Supplementary Table 1: Cancer site case-mix of incidentally diagnosed cancer patients
- *Sensitivity analysis using a broader definition of incidental diagnosis*
  - Supplementary Table 2: Characteristics of incidental cancer patients versus non-incidental cancer patients, and crude/adjusted odds ratios of incidental status (n=14,082)
  - Supplementary Figure 2: Odds ratios of incidental versus symptomatic diagnosis of cancer by cancer site (n=14,082; reference group: colorectal cancer)

Supplementary files for Koo et al., 2019

Supplementary Figure 1: Flow chart describing sample derivation for main analysis

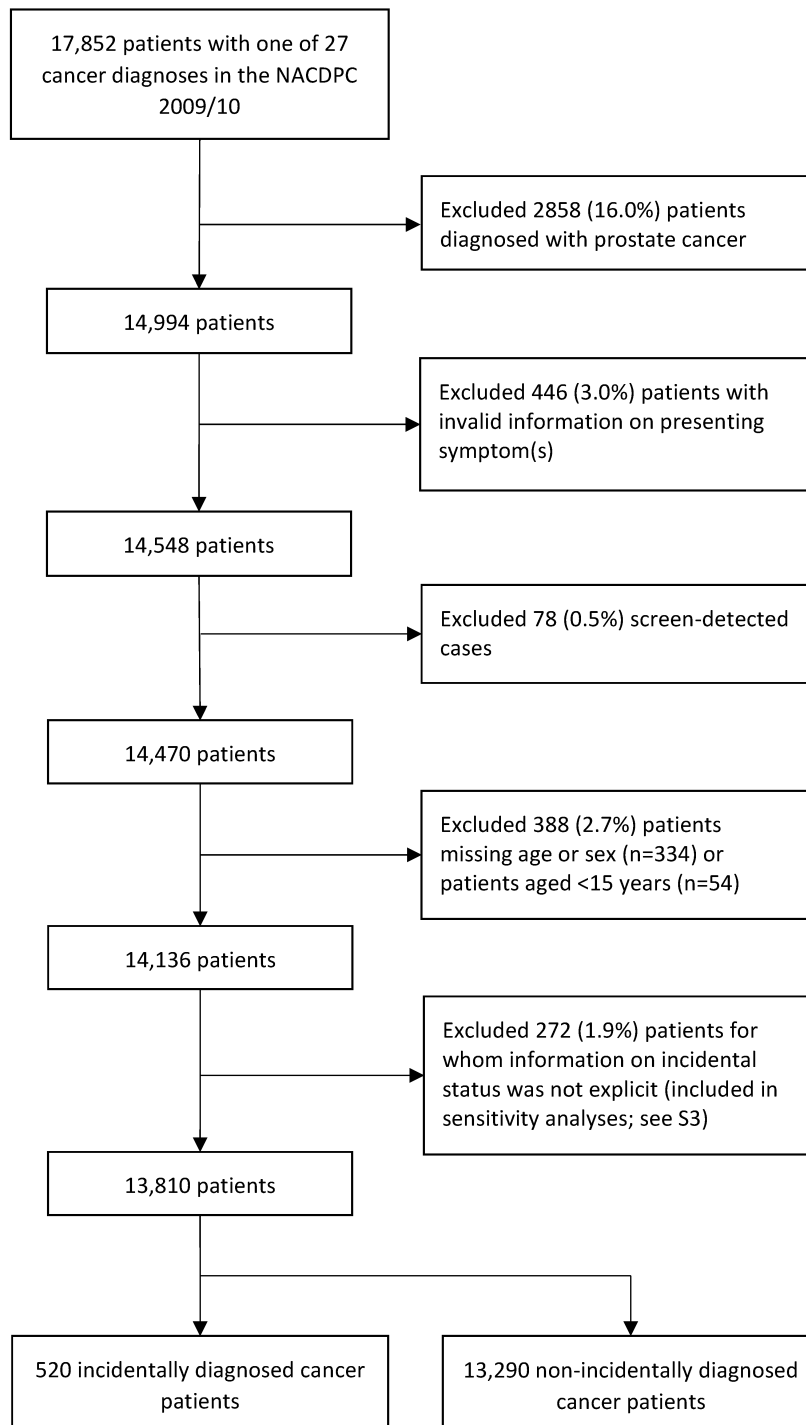

Supplementary files for Koo et al., 2019

**Supplementary Table 1: Cancer site case-mix of incidentally diagnosed cancer patients**

| <b>Cancer</b>   | <b>N</b>   | <b>% (95% CI)<sup>†</sup></b> |
|-----------------|------------|-------------------------------|
| Leukaemia*      | 103        | 20% (17–23%)                  |
| Lung            | 77         | 15% (12–18%)                  |
| Colorectal      | 66         | 13% (10–16%)                  |
| Renal           | 46         | 9% (7–12%)                    |
| Breast          | 34         | 7% (5–9%)                     |
| Lymphoma        | 33         | 6% (5–9%)                     |
| Melanoma        | 30         | 6% (4–8%)                     |
| Bladder         | 28         | 5% (4–8%)                     |
| Myeloma         | 20         | 4% (3–6%)                     |
| Thyroid         | 13         | 3% (1–4%)                     |
| Liver           | 11         | 2.1% (1.2–3.7%)               |
| Ovarian         | 10         | 1.9% (1.0–3.5%)               |
| Stomach         | 8          | 1.5% (0.8–3.0%)               |
| Endometrial     | 6          | 1.2% (0.5–2.5%)               |
| Pancreatic      | 6          | 1.2% (0.5–2.5%)               |
| Gallbladder     | 5          | 1.0% (0.4–2.2%)               |
| Oropharyngeal   | 5          | 1.0% (0.4–2.2%)               |
| Mesothelioma    | 4          | 0.8% (0.3–2.0%)               |
| Laryngeal       | 3          | 0.6% (0.2–1.7%)               |
| Oesophageal     | 3          | 0.6% (0.2–1.7%)               |
| Vulval          | 3          | 0.6% (0.2–1.7%)               |
| Brain           | 2          | 0.4% (0.1–1.4%)               |
| Testicular      | 2          | 0.4% (0.1–1.4%)               |
| Sarcoma*        | 1          | 0.2% (0.03–1.1%)              |
| Small Intestine | 1          | 0.2% (0.03–1.1%)              |
| <b>Total</b>    | <b>520</b> | <b>100%</b>                   |

<sup>†</sup> Proportion of patients with each cancer site, of the total incidentally diagnosed population (n=520)

\*No information was available on leukaemia or sarcoma type.

Supplementary files for Koo et al., 2019

**Supplementary Table 2: Characteristics of incidental cancer patients versus non-incident cancer patients, and crude/adjusted odds ratios of incidental status (n=14,082)**

|                    | Total |     | Incidental   |  | Crude                        | Adjusted <sup>a</sup>        |
|--------------------|-------|-----|--------------|--|------------------------------|------------------------------|
|                    | N     | n   | % (95% CI)   |  | OR (95% CI)                  | OR (95% CI)                  |
| Total              | 14082 | 792 | 6% (5–6%)    |  | -                            | -                            |
| <b>Sex</b>         |       |     |              |  | <b>0.001<sup>b</sup></b>     | <b>0.045<sup>b</sup></b>     |
| Men                | 5983  | 422 | 7% (6–8%)    |  | Ref.                         | Ref.                         |
| Women              | 8099  | 370 | 5% (4–5%)    |  | 0.63 (0.55–0.73)             | 0.84 (0.71–1.00)             |
| <b>Age group</b>   |       |     |              |  | <b>&lt;0.001<sup>b</sup></b> | <b>&lt;0.001<sup>b</sup></b> |
| 15–49 years        | 2089  | 48  | 2% (2–3%)    |  | 0.36 (0.26–0.50)             | 0.36 (0.26–0.51)             |
| 50–59 years        | 2080  | 95  | 5% (4–6%)    |  | 0.73 (0.57–0.94)             | 0.75 (0.58–0.98)             |
| 60–69 years        | 3264  | 200 | 6% (5–7%)    |  | Ref.                         | Ref.                         |
| 70–79 years        | 3739  | 253 | 7% (6–8%)    |  | 1.11 (0.92–1.35)             | 1.08 (0.89–1.33)             |
| 80+ years          | 2910  | 196 | 7% (6–8%)    |  | 1.11 (0.90–1.36)             | 1.17 (0.94–1.45)             |
| <b>Cancer site</b> |       |     |              |  | <b>&lt;0.001<sup>b</sup></b> | <b>&lt;0.001<sup>b</sup></b> |
| Leukaemia*         | 511   | 164 | 32% (28–36%) |  | 11.25 (8.55–14.81)           | 12.48 (9.46–16.48)           |
| Liver              | 116   | 24  | 21% (14–29%) |  | 6.21 (3.79–10.16)            | 6.28 (3.82–10.32)            |
| Renal              | 373   | 63  | 17% (13–21%) |  | 4.84 (3.45–6.78)             | 5.12 (3.64–7.19)             |
| Thyroid            | 113   | 16  | 14% (9–22%)  |  | 3.93 (2.23–6.92)             | 5.93 (3.31–10.60)            |
| Myeloma            | 241   | 33  | 14% (10–19%) |  | 3.78 (2.48–5.74)             | 3.74 (2.46–5.69)             |
| Gallbladder        | 68    | 5   | 7% (3–16%)   |  | 1.89 (0.74–4.80)             | 2.00 (0.78–5.09)             |
| Bladder            | 869   | 55  | 6% (5–8%)    |  | 1.61 (1.15–2.26)             | 1.52 (1.08–2.14)             |
| Lung               | 1913  | 115 | 6% (5–7%)    |  | 1.52 (1.15–2.01)             | 1.50 (1.14–1.97)             |
| Lymphoma           | 704   | 39  | 6% (4–7%)    |  | 1.40 (0.95–2.04)             | 1.64 (1.12–2.41)             |
| Mesothelioma       | 75    | 4   | 5% (2–13%)   |  | 1.34 (0.48–3.75)             | 1.23 (0.44–3.45)             |
| Melanoma           | 839   | 35  | 4% (3–6%)    |  | 1.04 (0.70–1.54)             | 1.30 (0.88–1.94)             |
| Vulval             | 73    | 3   | 4% (1–11%)   |  | 1.02 (0.32–3.30)             | 1.19 (0.37–3.87)             |
| Colorectal         | 2431  | 98  | 4% (3–5%)    |  | Ref.                         | Ref.                         |
| Ovarian            | 398   | 14  | 4% (2–6%)    |  | 0.87 (0.49–1.54)             | 1.05 (0.59–1.88)             |
| Stomach            | 303   | 9   | 3% (2–6%)    |  | 0.73 (0.36–1.46)             | 0.72 (0.36–1.44)             |
| Breast             | 2717  | 76  | 3% (2–3%)    |  | 0.69 (0.51–0.93)             | 0.91 (0.66–1.25)             |
| Pancreatic         | 374   | 10  | 3% (1–5%)    |  | 0.65 (0.34–1.27)             | 0.66 (0.34–1.28)             |
| Laryngeal          | 121   | 3   | 2% (1–7%)    |  | 0.61 (0.19–1.94)             | 0.62 (0.19–1.98)             |
| Oropharyngeal      | 213   | 5   | 2% (1–5%)    |  | 0.57 (0.23–1.42)             | 0.68 (0.27–1.69)             |
| Endometrial        | 413   | 9   | 2% (1–4%)    |  | 0.53 (0.27–1.06)             | 0.62 (0.31–1.24)             |
| Small Intestine    | 53    | 1   | 2% (–10%)    |  | 0.46 (0.06–3.35)             | 0.48 (0.07–3.55)             |
| Sarcoma*           | 107   | 2   | 2% (1–7%)    |  | 0.45 (0.11–1.86)             | 0.57 (0.14–2.36)             |
| Testicular         | 149   | 2   | 1% (–5%)     |  | 0.32 (0.08–1.33)             | 0.66 (0.16–2.76)             |
| Brain              | 215   | 2   | 1% (–3%)     |  | 0.22 (0.05–0.91)             | 0.25 (0.06–1.02)             |
| Cervical           | 126   | 1   | 1% (–4%)     |  | 0.19 (0.03–1.38)             | 0.29 (0.04–2.09)             |
| Oesophageal        | 567   | 4   | 1% (–2%)     |  | 0.17 (0.06–0.46)             | 0.17 (0.06–0.45)             |

<sup>a</sup> adjusted for sex, age group, and cancer site<sup>b</sup> joint Wald test p-value

\*No information was available on leukaemia or sarcoma type.

Supplementary files for Koo et al., 2019

**Supplementary Figure 2: Odds ratios of incidental versus symptomatic diagnosis of cancer by cancer site (n=14,082; reference group: colorectal cancer)**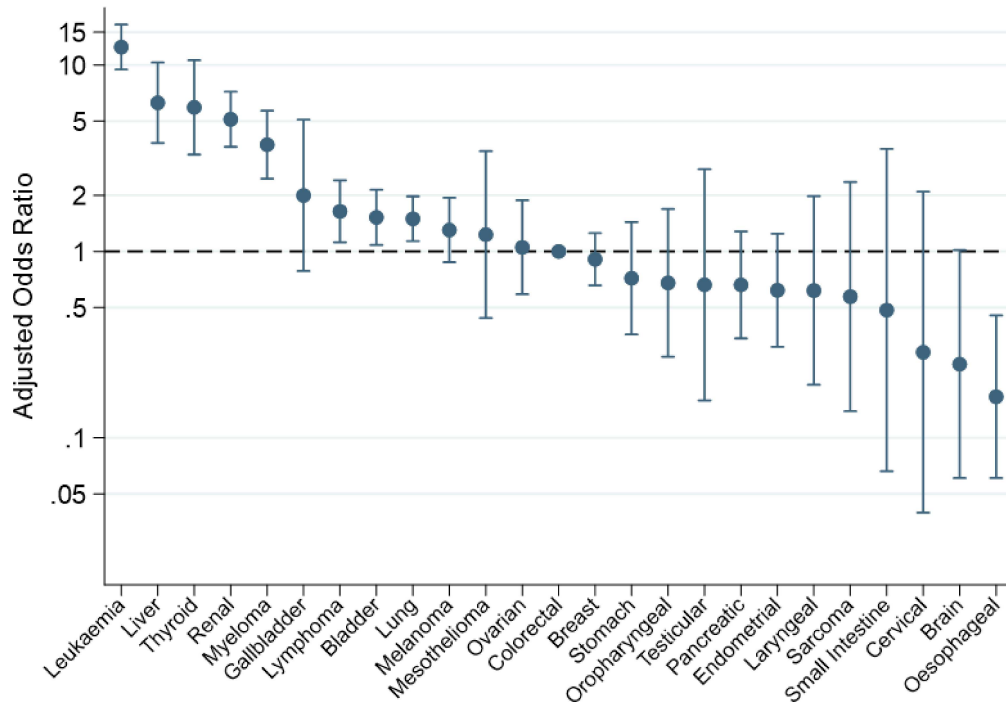

Supplement: bmjopen-2018-028362supp001.pdf [file bmjopen-2018-028362supp001.pdf]
